# Supplementary material for: Evolution of the Global Scientific Research on the Environmental Impact of Food Production from 1970 to 2020
Source: MDPI journal article supplement (doi:10.3390/su132111633), 2021-10-21
Supplement: s1 [file sustainability-1381104-supplementary.pdf › sustainability-1381104-supplementary.pdf]

## Supplementary materials

### Table legends

**Table S1:** List of terms used for the query string: Category 1- Selected Terms of two thematic groups, A- Standard methods and B- Generic Terms

**Table S1:** List of terms used for the query string: Category 2- Food products, Crop production Terms.

**Table S3:** List of terms used for the query string: Category 2 - Food products, category Crop processed, Live Animals, Livestock Primary, Livestock Processed.

**Table S4:** List of terms used for the query string: Category 2 - Food products, category Generic, Food and beverage.

**Table S5:** List of terms used for textual analysis of abstract.

**Table S6:** Scientific production in EAFP for the top 5 nations ranked by the number of documents published related to their population (<https://www.worldometers.info/world-population>) and governmental investment in R&D (<https://www.rdworltonline.com/2021-global-rd-funding-forecast-released>)..

**Table S1.** List of terms used for the query string and textual analysis: Category 1- *Selected Terms* of two thematic groups, A-Standard methods and B- Generic Terms.

| <b>Selected Terms - Category 1</b> |                                   |
|------------------------------------|-----------------------------------|
| <b>n</b>                           | <b>A- Standard methods</b>        |
| 1                                  | Cumulative Energy Demand          |
| 2                                  | PAS 2050                          |
| 3                                  | Australian Wine Carbon Calculator |
| 4                                  | Environmental Product Declaration |
| 5                                  | Life Cycle Assessment             |
| 6                                  | LCA                               |
| 7                                  | Ecological footprint              |
| 8                                  | Water Footprint                   |
| 9                                  | Product Environmental Footprint   |
| 10                                 | IMPACT 2002+                      |
| 11                                 | CML 2002                          |
| 12                                 | EDIP 2003                         |
| 13                                 | TRACI                             |
| 14                                 | Eco-Indicator                     |
| 15                                 | EPS 2000                          |
| 16                                 | Eco Scarcity                      |
| 17                                 | Carbon footprint                  |
| <b>B - Generic</b>                 |                                   |
| 18                                 | environmental sustainability      |
| 19                                 | environmental assessment          |
| 20                                 | environmental impact              |
| 21                                 | sustainability                    |
| 22                                 | energy consumption                |
| 23                                 | energy efficiency                 |
| 24                                 | Energy demand                     |
| 25                                 | eco-efficiency                    |
| 26                                 | environmental profiles            |

1 **Table S2** List of terms used for the query string and textual analysis: Category 2- *Food products*, Crop production Terms.

2

| Crop production |                 |                |              |                   |                |
|-----------------|-----------------|----------------|--------------|-------------------|----------------|
| Agave           | Cashewapple     | peppers        | Lupins       | Peas              | Sorghum        |
| Almonds         | Cassava         | Eggs           | chicory      | Pepper            | Soybeans       |
| Anise           | Castor oil seed | Fibre crops    | Maize        | Persimmons        | Spinach        |
| Apples          | Cauliflowers    | Figs           | Mangoes      | Pigeon peas       | Strawberries   |
| Apricots        | broccoli        | Fonio          | Manila fibre | Pineapples        | String beans   |
| Areca nuts      | Cherries        | Garlic         | limes        | Pistachios        | Sugar beet     |
| Artichokes      | turnips         | Ginger         | Melons       | Plantains         | Sugar cane     |
| Asparagus       | Chestnut        | Gooseberries   | Melonseed    | Plums and sloes   | Sunflower      |
| Avocados        | Chick peas      | Grapefruit     | Milk         | Poppy seed        | Sweet potatoes |
| Bambara beans   | Chicory         | Grapes         | Millet       | Potatoes          | Tangerines     |
| Bananas         | Chillies        | Groundnuts,    | Mushrooms    | Pulses            | Taro           |
| Barley          | Chillies        | Gums           | Mustard seed | Pumpkins          | Tea            |
| Bastfibres      | Cinnamon        | Hazelnuts      | Nutmeg       | Pyrethrum         | Tobacco        |
| Beans           | Cloves          | Hemp tow waste | mace         | Quinces           | Tomatoes       |
| Beeswax         | Cocoa           | Honey          | Oats         | Quinoa            | Triticale      |
| Berries nes     | Coconuts        | Hops           | Oil palm     | Ramie             | Tung nuts      |
| Blueberries     | Coffee          | Jute           | cardamoms    | Rapeseed          | Vanilla        |
| Brazil nuts     | Cotton          | Karite nuts    | Okra         | Raspberries       | Leguminous     |
| Broad beans     | Cottonseed      | Kiwi           | Olives       | Rice              | Vetches        |
| Buckwheat       | Cow peas,       | Kola nuts      | Onions       | Rubber            | Walnuts        |
| Cabbages        | Cranberries     | Leeks          | Oranges      | Rye               | Watermelons    |
| Canary seed     | Cucumbers       | Lemons         | Palm kernels | Safflower seed    | Wheat          |
| Carobs          | Currants        | Lentils        | Papayas      | Sesame seed       | Wool           |
| Carrots         | Dates           | Lettuce        | Peaches      | Silk-worm cocoons | Yams           |
| Cashew nuts     | Eggplants       | Linseed        | Pears        | Sisal             | Yautia         |

3

**Table S3** List of terms used for the query string and textual analysis: Category 2 - *Food products*, category *Crop processed*, *Live Animals*, *Livestock Primary*, *Livestock Processed*.

| <b>Crop processed</b> | <b>Live Animals</b> | <b>Livestock Primary</b> | <b>Livestock Processed</b> |
|-----------------------|---------------------|--------------------------|----------------------------|
|                       | Asses               | Beeswax                  | Butter                     |
| Cotton lint           | Beehives            | Eggs                     | Silk raw                   |
| Cottonseed            | Buffaloes           | Fat                      | Tallow                     |
| Margarine             | Camelids            | Hides                    | Whey                       |
| Molasses              | Camels              | Honey                    | Cheese                     |
| coconut Oil           | Cattle              | Offals                   | butteroil                  |
| cottonseed Oil        | Chickens            | Skins                    | fresh Cream                |
| groundnut Oil         | Ducks               |                          | Ghee                       |
| linseed Oil           | Geese               |                          | Lard                       |
| maize Oil             | Goats               |                          | Milk                       |
| olive Oil             | Horses              |                          | Yoghurt                    |
| palm Oil              | Mules               |                          | Meat                       |
| palm kernel Oil       | Pigeons             |                          | red meat                   |
| rapeseed Oil          | Pigs                |                          | kefir                      |
| safflower Oil         | Rabbits             |                          | dairy                      |
| sesame Oil            | Rodents             |                          |                            |
| soybean Oil           | Sheep               |                          |                            |
| sunflower Oil         | Turkeys             |                          |                            |
| Palm kernels          | geese               |                          |                            |
| Sugar                 | guinea fowls        |                          |                            |
|                       | fish                |                          |                            |

**Table S4** List of terms used for the query string and textual analysis : Category 2 - *Food products*, category *Generic*, *Food and beverage*.

| <b>Generic</b>      | <b>Foods</b>         | <b>Beverage</b>     |
|---------------------|----------------------|---------------------|
| foodwaste           | Biscuit              | mineral water       |
| mineral water       | Pizza                | Wine                |
| food                | food                 | lager               |
| vegetable           | meat                 | tea                 |
| food waste          | ice cream            | coffe               |
| fruits              | hamburger            | sweetened beverages |
| Seafood             | kefir                | Fruit juices        |
| nutseed             | pasta                | milk                |
| whole grain         | bread                | beer                |
| nut seed            | Chocolate            | champagne           |
| processed meat      | desserts             | grappa              |
| sweetened beverages | Cake                 | brandy              |
| Fruit juices        | <b>Cereal grains</b> | <b>Whisky</b>       |
| legumes             | breakfast cereals    |                     |
| nuts                | Cereal bars          |                     |
| seed                | Muesli               |                     |
| meal                | Porridge             |                     |

|                      |                 |
|----------------------|-----------------|
| ready to eat         | Cereal dough    |
| soup                 | Pasta           |
| salad                | breadsticks     |
| grain-based products | Crackers        |
| Fermented fruit      | Crisp bread     |
| Candied fruits       | doughs          |
| Dried fruit          | Bakery products |
| Canned fruit         | pastry          |

**Table S5** List of terms used for textual analysis of abstract.

| <b>Impact Category</b>                    | <b>Production phase</b>       | <b>Packaging materials</b> |
|-------------------------------------------|-------------------------------|----------------------------|
| human health                              | Supply chain                  | Ceramics                   |
| Cancer                                    | market                        | Glass                      |
| air quality                               | retail                        | Metal                      |
| climate change                            | transportation                | Paper and Board            |
| Global Warming Potential                  | logistics                     | Plastics                   |
| GWP100                                    | manufacturing                 | Printing Inks              |
| Ozone depletion                           | raw material                  | Wax                        |
| Ozone Depletion Potential                 | packaging                     | Wood                       |
| ODP                                       | pre-retail                    | polyethylene               |
| Human toxicity                            | retail                        | High Density Polyethylene  |
| Comparative Toxic Unit                    | post retail                   | polyethylene terephthalate |
| Particulate matter                        | food service                  | polyvinyl chloride         |
| Ionising radiation                        | storing                       | polystyrene                |
| Photochemical ozone formation             | restaurant                    | poly carbonate             |
| Tropospheric ozone concentration increase | local                         | Cartonboard                |
| Acidification                             | regional                      | recycled paper             |
| Eutrophication                            | global                        | virgin fibers              |
| Ecotoxicity                               | consumer                      | paperboard box             |
| Land use                                  | post harvest                  | Corrugated board           |
| Soil quality index                        | storage                       | aluminium                  |
| Biotic production                         | agricultural production       |                            |
| Erosion resistance                        | consumption                   |                            |
| Mechanical filtration                     | food processing               |                            |
| Groundwater replenishment                 | refrigerated transport        |                            |
| Water use                                 | refrigerated storage          |                            |
| Resource use                              | End-of-life                   |                            |
| methane                                   | Truck transport               |                            |
| carbon dioxide                            | Van transport                 |                            |
| carbon monoxide                           | Consumer transport            |                            |
| Pesticides                                | plane                         |                            |
| Fertilisers                               | train                         |                            |
| manure                                    | local supply chain            |                            |
| Heavy metal                               | intracontinental supply chain |                            |
|                                           | circular economy              |                            |
|                                           | transoceanic transport        |                            |

**Table S6**

Scientific production in EAFP for the top 5 nations ranked by the number of documents published related to their population (<https://www.worldometers.info/world-population>) and governmental investment in R&D (<https://www.rdworldonline.com/2021-global-rd-funding-forecast-released>).

| <b>Country</b> | <b>Population (Mil.)</b> | <b>R&amp;D Bil. € (2020)</b> | <b>n. pub.</b> | <b>n.pub/Bil.US\$</b> | <b>pop/n.pub</b> |
|----------------|--------------------------|------------------------------|----------------|-----------------------|------------------|
| CHINA          | 1.444                    | 532,8                        | 547            | 1,027                 | 0,4              |
| USA            | 333                      | 596,6                        | 465            | 0,779                 | 1,4              |
| ITALY          | 60                       | 31,4                         | 464            | 14,768                | 7,7              |
| UK             | 68                       | 53                           | 328            | 6,169                 | 4,8              |
| SPAIN          | 47                       | 24                           | 283            | 11,961                | 6,0              |
